# Supplementary material
Source: Springer Nature journal article supplement (https://www.springermedizin.de/resource/supplementary/12914_2011_199_MOESM1_ESM.pdf/9537104)

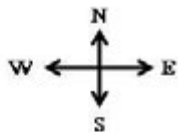

### Legend

◇ Urban Center

○ Rural Town

★ Camp

— Tarred Road

- · - Dirt Road

□ Research Office

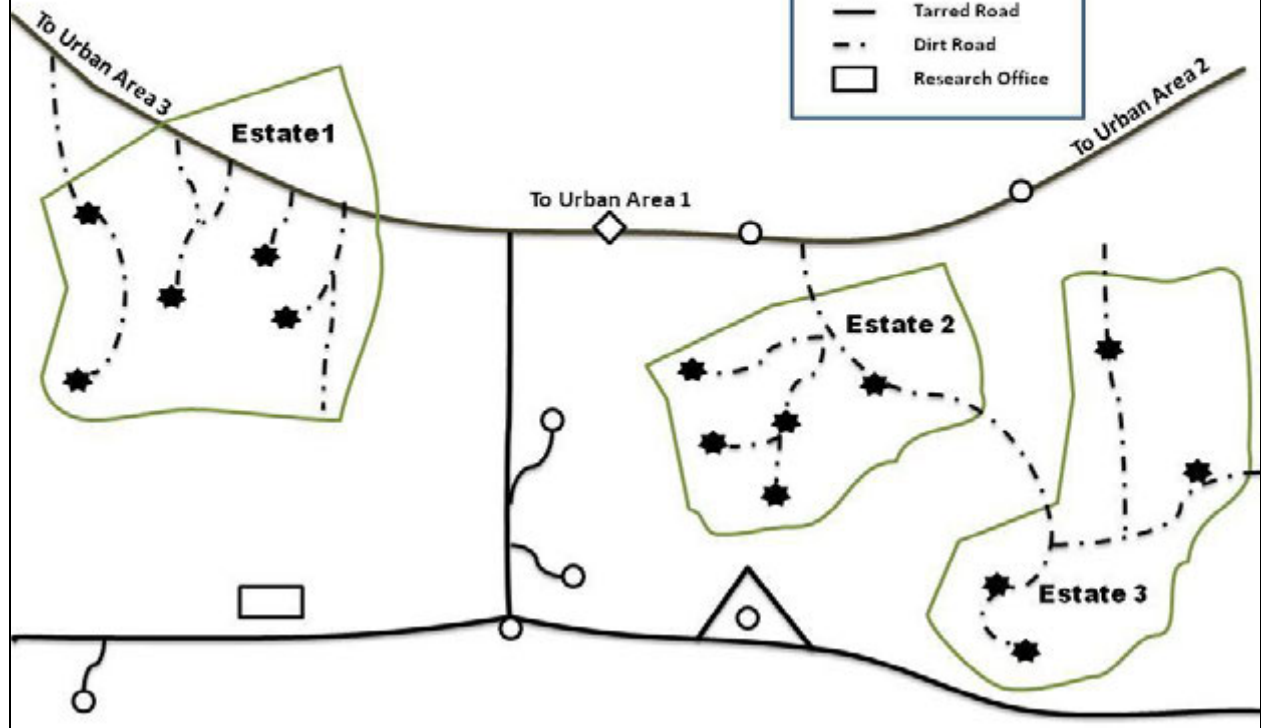

Supplement: MOESM1 [file 9537104]
